# Supplementary material for: TGF-β from the Porcine Intestinal Cell Line IPEC-J2 Induced by Porcine Circovirus 2 Increases the Frequency of Treg Cells via the Activation of ERK (in CD4+ T Cells) and NF-κB (in IPEC-J2)
Source: MDPI journal article supplement (doi:10.3390/v14112466), 2022-11-08
Supplement: s1 [file s1]

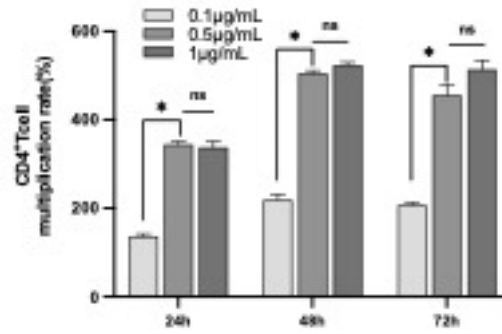

**Figure S1. The concentration of antibodies that activate CD4<sup>+</sup>T cells.** CD4<sup>+</sup>T cells were transfected with different doses of CD3/CD28. The CD25 mRNA was detected after 24 hours, 48 hours, 72 hours. All assays were performed in triplicate, with three technical repeats for each sample. \*\*,  $P < 0.01$ ; \*,  $P < 0.05$ .

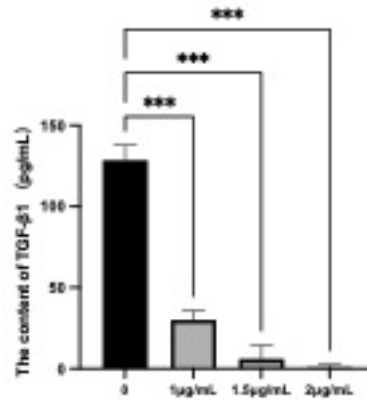

**Figure S2. TGF- $\beta$  protein levels after antibody treatment in IPEC-J2.** TGF- $\beta$  was detected with ELISA while adding the antibody to PCV2-infected IPEC-J2 after 48 hours. All assays were performed in triplicate, with three technical repeats for each sample. \*\*,  $P < 0.01$ ; \*,  $P < 0.05$ .
